# Supplementary material
Source: ML conference proceedings conference paper supplement (https://openaccess.thecvf.com/content/CVPR2023/html/Yoon_Cross-Guided_Optimization_of_CVPR_2023_paper.html)
Supplement: Supplementary file 1 [file Yoon_Cross-Guided_Optimization_of_CVPR_2023_supplemental.pdf]

# Cross-Guided Optimization of Radiance Fields with Multi-View Image Super-Resolution for High-Resolution Novel View Synthesis

## –Supplementary Material–

Youngho Yoon and Kuk-Jin Yoon  
 Visual Intelligence Lab., KAIST, Korea  
 {dudgh1732, kjyoon}@kaist.ac.kr

### Abstract

*Due to the lack of space in the main paper, we provide more details of the proposed methods and experimental results in the supplementary material. Specifically, in Sec.1, we provide more details of voxel-based uncertainty fields. Sec.2 explains more details about the experiments.*

### 1. More details of voxel-based uncertainty fields

In the process of deriving voxel-based uncertainty fields, we propagate all  $e_{ij}^{tv}$  to 8 adjacent voxel grids. To simplify this process, we perform backpropagation on empty voxel grids to get the uncertainty fields in one step. The value propagate to the voxel grid  $v_i$  is as follows:

$$v_i = \frac{\sum_j w_{ij} e_{ij}^{tv}}{\sum_j w_{ij}} \quad (1)$$

At this time,  $w_{ij}$  is the trilinear interpolation weight of  $p_{ij}^{tv}$  with respect to  $v_i$ . We perform the following process to obtain this process for all voxel grids at once. First, a randomly initialized dense grid  $V^{(empty)}$  is created. At this time,  $q_i$  is the  $i^{th}$  voxel grid’s learnable parameter in  $V^{(empty)}$ . We calculate the following two functions for the sampling points for all train-view images.

$$F_h = \sum_i \sum_j q_i w_{ij} = \sum_i f_{tri}(p_i, V^{(empty)}) \quad (2)$$

$$F_g = \sum_i \sum_j q_i w_{ij} e_{ij}^{tv} = \sum_i f_{tri}(p_i, V^{(empty)}) e_{p_i}^{tv} \quad (3)$$

where  $f_{tri}$  is a trilinear interpolation function.  $f_{tri}$  is implemented through the grid sample function in pytorch [5]. Now, we can derive the following equations via backpropagation:

$$\frac{\partial F_h}{\partial q_i} = \sum_j w_{ij}, \quad \frac{\partial F_g}{\partial q_i} = \sum_j w_{ij} e_{ij}^{tv} \quad (4)$$

Finally, we derive the following equation.

$$v_i = \frac{\sum_j w_{ij} e_{ij}^{tv}}{\sum_j w_{ij}} = \frac{\partial F_g / \partial q_i}{\partial F_h / \partial q_i} \quad (5)$$

Therefore, we can obtain uncertainty fields by finding the partial derivatives of  $F_h$  and  $F_g$  for all parameters  $q_i$ .

| Method                    | Type             | Novel View Synthesis |                    |                       | Multi-View SR      |                    |                       |
|---------------------------|------------------|----------------------|--------------------|-----------------------|--------------------|--------------------|-----------------------|
|                           |                  | PSNR( $\uparrow$ )   | SSIM( $\uparrow$ ) | LPIPS( $\downarrow$ ) | PSNR( $\uparrow$ ) | SSIM( $\uparrow$ ) | LPIPS( $\downarrow$ ) |
| Synthetic NeRF Dataset    |                  |                      |                    |                       |                    |                    |                       |
| SwinIR-ft                 | Single Image     | <u>30.3931</u>       | 0.9423             | <u>0.0717</u>         | 32.9711            | 0.9598             | <u>0.0601</u>         |
| VRT-ft                    | Video            | 30.3856              | <u>0.9424</u>      | 0.0721                | <u>32.9802</u>     | <u>0.9602</u>      | <u>0.0610</u>         |
| Ours(CROP)+SwinIR         | Multi-View Image | <b>30.7140</b>       | <b>0.9459</b>      | <b>0.0671</b>         | <b>33.7725</b>     | <b>0.9644</b>      | <b>0.0565</b>         |
| BlendedMVS Dataset        |                  |                      |                    |                       |                    |                    |                       |
| SwinIR-ft                 | Single Image     | 26.4403              | 0.8777             | 0.1505                | 29.2625            | 0.9021             | 0.1454                |
| VRT-ft                    | Video            | <u>26.6267</u>       | <u>0.8847</u>      | <u>0.1451</u>         | <u>29.6925</u>     | <u>0.9111</u>      | <u>0.1406</u>         |
| Ours(CROP)+SwinIR         | Multi-View Image | <b>26.6914</b>       | <b>0.8874</b>      | <b>0.1405</b>         | <b>29.7451</b>     | <b>0.9126</b>      | <b>0.1378</b>         |
| Tanks and Temples Dataset |                  |                      |                    |                       |                    |                    |                       |
| SwinIR-ft                 | Single Image     | 28.5525              | 0.9152             | 0.1463                | <u>35.8514</u>     | 0.9580             | <u>0.0853</u>         |
| VRT-ft                    | Video            | 28.5950              | 0.9160             | 0.1459                | 35.7594            | 0.9596             | <u>0.0853</u>         |
| Ours(CROP)+SwinIR         | Multi-View Image | <b>28.6490</b>       | <b>0.9176</b>      | <b>0.1425</b>         | <b>36.2430</b>     | <b>0.9613</b>      | <b>0.0808</b>         |

Table 1. HR novel view synthesis results and multi-view image SR results with fine-tuned models for X4 SR. SwinIR-ft means fine-tuned SwinIR and VRT-ft means fine-tuned VRT. **Bold** indicates the best results, and underline indicates the second best results.

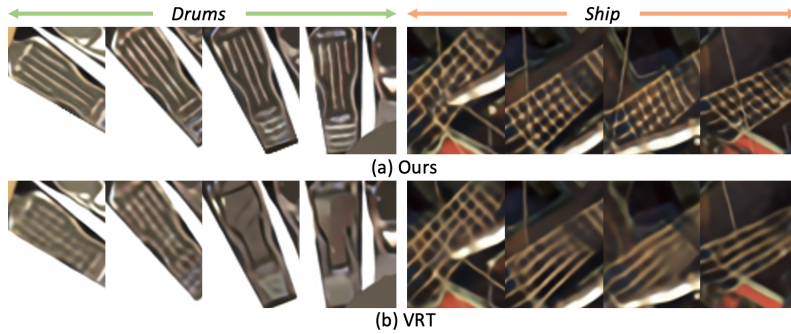

Figure 1. SR results of adjacent images on the Synthetic-NeRF dataset obtained from our model (a) and VRT (b).

## 2. More details of Experiments

### 2.1. Comparison with fine-tuned models

As in Table 1 in the main paper, we conducted experiments on three test datasets. Among them, the ‘Synthetic NeRF’ dataset and the ‘Tanks and Temple’ dataset are not used for training. The ‘BlendedMVS’ dataset is split into the training set and the test set, and the training split of ‘BlendedMVS’ is used for the training of SUM along with the ‘RTMV’ dataset. The training dataset used for SUM has a smaller domain gap with the test datasets, therefore, for a fair evaluation, we additionally fine-tuned SwinIR and VRT models using the same training dataset used for SUM and conducted a quantitative comparison. As shown in Table 1, our model demonstrates better performances in HRNVS and MVSR compared to the fine-tuned SwinIR (SwinIR-ft) and fine-tuned VRT (VRT-ft). Through this experiment, we also demonstrated that our SR models can utilize multi-view images as a training dataset more effectively than existing SR models.

### 2.2. Discussion about view consistency

The HRNVS performance of our model serves as indirect proof of improved view consistency. For example, poor multi-view consistency in train-view images leads to inaccurate scene geometry in the radiance fields model, negatively impacting HRNVS results. As such, our HRNVS performance can be inferred as evidence of improved view consistency. Additionally, as shown in Fig. 1, our sequential results for the same scene demonstrate visually high multi-view consistency.

### 2.3. Datasets for training SUM

We additionally visualize the datasets to train the SR update module (SUM). We use 40 scenes from the BlendedMVS dataset and 60 scenes from the RTMV dataset. As shown in Fig. 2, we visualize the results of 4 scenes for BlendedMVS dataset (a,b,c,d) and RTMV dataset (e,f,g,h), respectively. The first to fourth columns are, in order, low-resolution image, high-resolution image, rendered RGB output, and uncertainty map.

## 2.4. Quantitative Results

We additionally show the results of high-resolution novel view synthesis (HRNVS) and multi-view image super-resolution (MVSR) for each scene in the three datasets. Table. 2, Table. 4, and Table. 6 are results for HRNVS, and Table. 3, Table. 5, and Table. 7 are results for MVSR.

## 2.5. Qualitative Comparison

We additionally visualize the qualitative comparison of HRNVS and MVSR. Figure. 3 shows the results for HRNVS, and Fig. 4 and Fig. 5 show the results for MVSR.

## References

- [1] Ri Cheng, Yuqi Sun, Bo Yan, Weimin Tan, and Chenxi Ma. Geometry-aware reference synthesis for multi-view image super-resolution. In *Proceedings of the 30th ACM International Conference on Multimedia*, pages 6083–6093, 2022. 4, 5, 6
- [2] Jingyun Liang, Jiezhong Cao, Yuchen Fan, Kai Zhang, Rakesh Ranjan, Yawei Li, Radu Timofte, and Luc Van Gool. Vrt: A video restoration transformer. *arXiv preprint arXiv:2201.12288*, 2022. 4, 5, 6
- [3] Jingyun Liang, Jiezhong Cao, Guolei Sun, Kai Zhang, Luc Van Gool, and Radu Timofte. Swinir: Image restoration using swin transformer. In *Proceedings of the IEEE/CVF International Conference on Computer Vision*, pages 1833–1844, 2021. 4, 5, 6
- [4] Bee Lim, Sanghyun Son, Heewon Kim, Seungjun Nah, and Kyoung Mu Lee. Enhanced deep residual networks for single image super-resolution. In *Proceedings of the IEEE conference on computer vision and pattern recognition workshops*, pages 136–144, 2017. 4, 5, 6
- [5] Adam Paszke, Sam Gross, Francisco Massa, Adam Lerer, James Bradbury, Gregory Chanan, Trevor Killeen, Zeming Lin, Natalia Gimelshein, Luca Antiga, Alban Desmaison, Andreas Kopf, Edward Yang, Zachary DeVito, Martin Raison, Alykhan Tejani, Sasank Chilamkurthy, Benoit Steiner, Lu Fang, Junjie Bai, and Soumith Chintala. Pytorch: An imperative style, high-performance deep learning library. In *Advances in Neural Information Processing Systems 32*, pages 8024–8035. Curran Associates, Inc., 2019. 1
- [6] Chen Wang, Xian Wu, Yuan-Chen Guo, Song-Hai Zhang, Yu-Wing Tai, and Shi-Min Hu. Nerf-sr: High quality neural radiance fields using supersampling. In *Proceedings of the 30th ACM International Conference on Multimedia*, pages 6445–6454, 2022. 4, 5, 6

| Method                | Chair          | Drums          | Ficus          | Hotdog         | Lego           | Materials      | Mic            | Ship           | Avg.           |
|-----------------------|----------------|----------------|----------------|----------------|----------------|----------------|----------------|----------------|----------------|
| PSNR( $\uparrow$ )    |                |                |                |                |                |                |                |                |                |
| LR                    | 29.7755        | 23.8981        | 27.9507        | 33.3681        | 29.1700        | 27.1356        | 30.3919        | 26.9668        | 28.5821        |
| NeRF-SR [6]           | 30.2272        | 24.2528        | 29.4971        | 33.4723        | 29.5622        | 26.9168        | 30.3976        | 26.8422        | 28.8960        |
| EDSR [4]              | 30.7208        | 24.6691        | 29.9158        | 34.8040        | 30.4855        | 28.8484        | 31.2529        | 27.6478        | 29.7931        |
| SwinIR [3]            | 31.2154        | 24.9985        | <u>31.0068</u> | 35.4589        | <u>32.2369</u> | <u>29.2156</u> | 31.6982        | 28.0719        | 30.4878        |
| MVSRnet [1]           | 30.9722        | 24.7673        | 30.1083        | 35.1703        | 30.9997        | 28.8978        | 31.4135        | 27.7022        | 30.0039        |
| VRT [2]               | <u>31.3786</u> | <b>25.0779</b> | 30.8626        | <u>35.5274</u> | 32.1902        | <b>29.2180</b> | <u>31.7118</u> | <u>28.0914</u> | <u>30.5072</u> |
| Ours(CROP)+EDSR       | 30.8831        | 24.6148        | 30.7071        | 35.1610        | 30.7669        | 28.8738        | 31.4810        | 27.7933        | 30.0351        |
| Ours(CROP)+SwinIR     | <b>31.5335</b> | <u>24.9992</u> | <b>31.5063</b> | <b>35.6218</b> | <b>32.8868</b> | 29.1645        | <b>31.7679</b> | <b>28.2320</b> | <b>30.7140</b> |
| SSIM( $\uparrow$ )    |                |                |                |                |                |                |                |                |                |
| LR                    | 0.9263         | 0.8976         | 0.9436         | 0.9591         | 0.9240         | 0.9138         | 0.9645         | 0.8397         | 0.9211         |
| NeRF-SR [6]           | 0.9372         | 0.9062         | 0.9552         | 0.9608         | 0.9318         | 0.9173         | 0.9637         | 0.8403         | 0.9266         |
| EDSR [4]              | 0.9398         | 0.9155         | 0.9591         | 0.9679         | 0.9412         | 0.9432         | 0.9697         | 0.8526         | 0.9361         |
| SwinIR [3]            | 0.9459         | 0.9226         | <u>0.9677</u>  | 0.9708         | <u>0.9588</u>  | <u>0.9464</u>  | <u>0.9728</u>  | 0.8599         | 0.9431         |
| MVSRnet [1]           | 0.9440         | 0.9178         | 0.9612         | 0.9702         | 0.9477         | 0.9438         | 0.9709         | 0.8545         | 0.9388         |
| VRT [2]               | <u>0.9481</u>  | <u>0.9230</u>  | 0.9668         | <u>0.9714</u>  | <u>0.9588</u>  | 0.9463         | <u>0.9728</u>  | <u>0.8606</u>  | <u>0.9435</u>  |
| Ours(CROP)+EDSR       | 0.9458         | 0.9183         | 0.9652         | 0.9701         | 0.9486         | 0.9443         | 0.9719         | 0.8581         | 0.9403         |
| Ours(CROP)+SwinIR     | <b>0.9513</b>  | <b>0.9236</b>  | <b>0.9709</b>  | <b>0.9725</b>  | <b>0.9641</b>  | <b>0.9468</b>  | <b>0.9740</b>  | <b>0.8637</b>  | <b>0.9459</b>  |
| LPIPS( $\downarrow$ ) |                |                |                |                |                |                |                |                |                |
| LR                    | 0.0841         | 0.1217         | 0.0715         | 0.0754         | 0.1075         | 0.1094         | 0.0456         | 0.1997         | 0.1019         |
| NeRF-SR [6]           | 0.0786         | 0.1154         | 0.0510         | 0.0747         | 0.1019         | 0.1105         | 0.0486         | 0.2130         | 0.0992         |
| EDSR [4]              | 0.0708         | 0.1007         | 0.0461         | 0.0555         | 0.0870         | 0.0709         | 0.0336         | 0.1912         | 0.0820         |
| SwinIR [3]            | 0.0634         | 0.0890         | <u>0.0352</u>  | <u>0.0505</u>  | <u>0.0569</u>  | <u>0.0642</u>  | 0.0268         | 0.1805         | <u>0.0708</u>  |
| MVSRnet [1]           | 0.0642         | 0.0974         | 0.0449         | 0.0514         | 0.0757         | 0.0678         | 0.0299         | 0.1871         | 0.0773         |
| VRT [2]               | 0.0615         | <u>0.0887</u>  | 0.0363         | 0.0495         | 0.0585         | 0.0649         | <u>0.0261</u>  | 0.1805         | <u>0.0708</u>  |
| Ours(CROP)+EDSR       | <u>0.0604</u>  | 0.0927         | 0.0375         | 0.0528         | 0.0658         | 0.0661         | 0.0280         | <u>0.1801</u>  | 0.0729         |
| Ours(CROP)+SwinIR     | <b>0.0567</b>  | <b>0.0856</b>  | <b>0.0317</b>  | <b>0.0481</b>  | <b>0.0496</b>  | <b>0.0622</b>  | <b>0.0251</b>  | <b>0.1776</b>  | <b>0.0671</b>  |

Table 2. HR novel view synthesis results on the Synthetic NeRF dataset for X4 SR. **Bold** indicates the best results, and underline indicates the second best results.

| Method                | Chair          | Drums          | Ficus          | Hotdog         | Lego           | Materials      | Mic            | Ship           | Avg.           |
|-----------------------|----------------|----------------|----------------|----------------|----------------|----------------|----------------|----------------|----------------|
| PSNR( $\uparrow$ )    |                |                |                |                |                |                |                |                |                |
| EDSR [4]              | 31.0280        | 29.0701        | 33.1699        | 36.0150        | 31.2824        | 33.4061        | 31.0502        | 29.2705        | 31.7865        |
| SwinIR [3]            | 31.5610        | 30.3991        | <u>34.9668</u> | 37.0812        | 33.8057        | <u>35.3058</u> | 31.7382        | 30.1294        | 33.1234        |
| MVSRnet [1]           | 31.1493        | 29.2505        | 32.9244        | 36.4229        | 31.7389        | 33.5732        | 31.3718        | 29.2801        | 31.9639        |
| VRT [2]               | <u>31.8339</u> | <u>30.5930</u> | 34.8324        | <u>37.1716</u> | <u>33.9033</u> | <b>35.3397</b> | <u>31.9428</u> | <u>30.2596</u> | <u>33.2345</u> |
| Ours(CROP)+EDSR       | 31.0952        | 28.9368        | 34.5458        | 36.2754        | 31.4471        | 33.7515        | 31.5975        | 29.5630        | 32.1515        |
| Ours(CROP)+SwinIR     | <b>32.1797</b> | <b>30.6643</b> | <b>36.5222</b> | <b>37.6013</b> | <b>35.3525</b> | 35.1576        | <b>32.0609</b> | <b>30.6411</b> | <b>33.7725</b> |
| SSIM( $\uparrow$ )    |                |                |                |                |                |                |                |                |                |
| EDSR [4]              | 0.9390         | 0.9570         | 0.9752         | 0.9686         | 0.9430         | 0.9740         | 0.9664         | 0.8765         | 0.9500         |
| SwinIR [3]            | 0.9465         | <u>0.9700</u>  | <u>0.9843</u>  | <u>0.9741</u>  | <u>0.9658</u>  | <b>0.9825</b>  | 0.9732         | <u>0.8922</u>  | <u>0.9611</u>  |
| MVSRnet [1]           | 0.9438         | 0.9623         | 0.9766         | 0.9725         | 0.9507         | 0.9776         | 0.9704         | 0.8811         | 0.9544         |
| VRT [2]               | <u>0.9488</u>  | <u>0.9700</u>  | 0.9841         | 0.9740         | 0.9650         | 0.9820         | <u>0.9733</u>  | 0.8912         | 0.9610         |
| Ours(CROP)+EDSR       | 0.9462         | 0.9624         | 0.9817         | 0.9717         | 0.9518         | 0.9782         | 0.9721         | 0.8860         | 0.9563         |
| Ours(CROP)+SwinIR     | <b>0.9535</b>  | <b>0.9706</b>  | <b>0.9875</b>  | <b>0.9763</b>  | <b>0.9731</b>  | <u>0.9824</u>  | <b>0.9748</b>  | <b>0.8967</b>  | <b>0.9644</b>  |
| LPIPS( $\downarrow$ ) |                |                |                |                |                |                |                |                |                |
| EDSR [4]              | 0.0742         | 0.0744         | 0.0354         | 0.0562         | 0.0954         | 0.0568         | 0.0457         | 0.1830         | 0.0776         |
| SwinIR [3]            | 0.0671         | 0.0533         | 0.0268         | <u>0.0464</u>  | <u>0.0582</u>  | <b>0.0373</b>  | 0.0265         | <u>0.1642</u>  | 0.0600         |
| MVSRnet [1]           | 0.0675         | 0.0631         | 0.0366         | 0.0496         | 0.0796         | 0.0446         | 0.0313         | 0.1770         | 0.0687         |
| VRT [2]               | <u>0.0641</u>  | <u>0.0531</u>  | <u>0.0265</u>  | 0.0475         | 0.0599         | 0.0386         | <u>0.0253</u>  | 0.1643         | <u>0.0599</u>  |
| Ours(CROP)+EDSR       | 0.0645         | 0.0595         | 0.0297         | 0.0513         | 0.0693         | 0.0407         | 0.0267         | 0.1670         | 0.0636         |
| Ours(CROP)+SwinIR     | <b>0.0599</b>  | <b>0.0528</b>  | <b>0.0250</b>  | <b>0.0442</b>  | <b>0.0480</b>  | <u>0.0377</u>  | <b>0.0252</b>  | <b>0.1596</b>  | <b>0.0565</b>  |

Table 3. Multi-view image SR results on the Synthetic NeRF dataset for X4 SR. **Bold** indicates the best results, and underline indicates the second best results.



| Method                | Character      | Fountain       | Jade           | Statues        | Avg.           |
|-----------------------|----------------|----------------|----------------|----------------|----------------|
| PSNR( $\uparrow$ )    |                |                |                |                |                |
| LR                    | 25.6300        | 25.4200        | 26.4100        | 23.7200        | 25.2950        |
| NeRF-SR [6]           | 26.7233        | 26.0939        | <b>27.6352</b> | <b>25.2847</b> | 26.4342        |
| EDSR [4]              | 26.8400        | 26.2013        | 26.9429        | 24.5000        | 26.1210        |
| SwinIR [3]            | 27.3800        | 26.5087        | 27.2382        | 24.9400        | 26.5167        |
| MVSRnet [1]           | 27.2900        | 26.5225        | 27.2478        | 24.8300        | 26.4726        |
| VRT [2]               | <b>27.8000</b> | <b>26.7089</b> | 27.1691        | 24.6400        | <u>26.5795</u> |
| Ours(CROP)+EDSR       | 27.1285        | 26.1634        | 27.1293        | 24.6163        | 26.2594        |
| Ours(CROP)+SwinIR     | <u>27.7476</u> | <u>26.5683</u> | <u>27.4310</u> | <u>25.0186</u> | <b>26.6914</b> |
| SSIM( $\uparrow$ )    |                |                |                |                |                |
| LR                    | 0.9000         | 0.8400         | 0.8600         | 0.7900         | 0.8475         |
| NeRF-SR [6]           | 0.9149         | 0.8575         | 0.8857         | <u>0.8405</u>  | 0.8747         |
| EDSR [4]              | 0.9200         | 0.8581         | 0.8811         | 0.8300         | 0.8723         |
| SwinIR [3]            | 0.9200         | 0.8672         | 0.8874         | 0.8400         | 0.8787         |
| MVSRnet [1]           | 0.9200         | 0.8701         | 0.8889         | 0.8400         | 0.8798         |
| VRT [2]               | <u>0.9300</u>  | <b>0.8797</b>  | <u>0.8895</u>  | 0.8400         | <u>0.8848</u>  |
| Ours(CROP)+EDSR       | 0.9250         | 0.8677         | 0.8860         | 0.8386         | 0.8793         |
| Ours(CROP)+SwinIR     | <b>0.9316</b>  | <u>0.8777</u>  | <b>0.8939</b>  | <b>0.8462</b>  | <b>0.8874</b>  |
| LPIPS( $\downarrow$ ) |                |                |                |                |                |
| LR                    | 0.1100         | 0.2100         | 0.1800         | 0.2100         | 0.1775         |
| NeRF-SR [6]           | 0.0951         | 0.2006         | 0.1615         | 0.1969         | 0.1635         |
| EDSR [4]              | 0.0900         | 0.1951         | 0.1589         | 0.1900         | 0.1585         |
| SwinIR [3]            | <u>0.0800</u>  | 0.1856         | 0.1513         | 0.1800         | 0.1492         |
| MVSRnet [1]           | <u>0.0800</u>  | 0.1811         | 0.1486         | 0.1800         | 0.1474         |
| VRT [2]               | <u>0.0800</u>  | <u>0.1730</u>  | 0.1502         | 0.1800         | 0.1458         |
| Ours(CROP)+EDSR       | 0.0805         | 0.1798         | <u>0.1472</u>  | <u>0.1751</u>  | <u>0.1456</u>  |
| Ours(CROP)+SwinIR     | <b>0.0754</b>  | <b>0.1723</b>  | <b>0.1447</b>  | <b>0.1696</b>  | <b>0.1405</b>  |

Table 4. HR novel view synthesis results on the BlendedMVS dataset for X4 SR. **Bold** indicates the best results, and underline indicates the second best results.

| Method                | Character      | Fountain       | Jade           | Statues        | Avg.           |
|-----------------------|----------------|----------------|----------------|----------------|----------------|
| PSNR( $\uparrow$ )    |                |                |                |                |                |
| EDSR [4]              | 27.5832        | 27.5499        | 31.8448        | 28.0176        | 28.7489        |
| SwinIR [3]            | 28.2957        | 27.9407        | 32.3207        | 28.5672        | 29.2811        |
| MVSRnet [1]           | 28.0870        | 27.6973        | 32.1936        | 28.2734        | 29.0628        |
| VRT [2]               | <b>28.9996</b> | <b>28.5479</b> | <u>32.4471</u> | <u>28.7717</u> | <u>29.6916</u> |
| Ours(CROP)+EDSR       | 27.9300        | 27.3423        | 31.7107        | 28.2041        | 28.7968        |
| Ours(CROP)+SwinIR     | <u>28.9957</u> | <u>28.4602</u> | <b>32.6519</b> | <b>28.8726</b> | <b>29.7451</b> |
| SSIM( $\uparrow$ )    |                |                |                |                |                |
| EDSR [4]              | 0.9233         | 0.8697         | 0.9170         | 0.8665         | 0.8941         |
| SwinIR [3]            | 0.9350         | 0.8796         | 0.9236         | 0.8753         | 0.9034         |
| MVSRnet [1]           | 0.9344         | 0.8808         | 0.9250         | 0.8732         | 0.9034         |
| VRT [2]               | <u>0.9422</u>  | <b>0.8988</b>  | <u>0.9253</u>  | <u>0.8784</u>  | <u>0.9112</u>  |
| Ours(CROP)+EDSR       | 0.9343         | 0.8780         | 0.9197         | 0.8738         | 0.9015         |
| Ours(CROP)+SwinIR     | <b>0.9435</b>  | <u>0.8949</u>  | <b>0.9304</b>  | <b>0.8818</b>  | <b>0.9126</b>  |
| LPIPS( $\downarrow$ ) |                |                |                |                |                |
| EDSR [4]              | 0.0969         | 0.1927         | 0.1478         | 0.1904         | 0.1570         |
| SwinIR [3]            | 0.0847         | 0.1826         | 0.1480         | 0.1752         | 0.1476         |
| MVSRnet [1]           | 0.0849         | 0.1803         | 0.1480         | 0.1768         | 0.1475         |
| VRT [2]               | <b>0.0786</b>  | <b>0.1654</b>  | <u>0.1450</u>  | <u>0.1730</u>  | <u>0.1405</u>  |
| Ours(CROP)+EDSR       | 0.0843         | 0.1806         | 0.1556         | 0.1748         | 0.1488         |
| Ours(CROP)+SwinIR     | <u>0.0788</u>  | <u>0.1675</u>  | <b>0.1397</b>  | <b>0.1653</b>  | <b>0.1378</b>  |

Table 5. Multi-view image SR results on the BlendedMVS dataset for X4 SR. **Bold** indicates the best results, and underline indicates the second best results.

| Method                | Barn           | Caterpillar    | Family         | Ignatius       | Truck          | Avg.           |
|-----------------------|----------------|----------------|----------------|----------------|----------------|----------------|
| PSNR( $\uparrow$ )    |                |                |                |                |                |                |
| LR                    | 27.0067        | 25.7908        | 32.8656        | 23.9114        | 26.9718        | 27.3093        |
| NeRF-SR [6]           | 25.2235        | 24.2541        | 31.0649        | 27.5498        | 25.7183        | 26.7621        |
| EDSR [4]              | 27.2225        | 26.0106        | 33.6156        | 28.2580        | 27.3131        | 28.4840        |
| SwinIR [3]            | 27.3489        | 26.0865        | 33.8695        | <u>28.2542</u> | 27.3796        | 28.5877        |
| MVSRnet [1]           | 27.2672        | 26.0559        | 33.6632        | 28.2535        | 27.3558        | 28.5191        |
| VRT [2]               | 27.3022        | 26.0871        | <u>33.9469</u> | <b>28.2591</b> | <u>27.3912</u> | <u>28.5973</u> |
| Ours(CROP)+EDSR       | <u>27.3676</u> | <u>26.0909</u> | 33.8230        | 28.1396        | 27.3484        | 28.5539        |
| Ours(CROP)+SwinIR     | <b>27.4261</b> | <b>26.1932</b> | <b>33.9849</b> | 28.2154        | <b>27.4255</b> | <b>28.6490</b> |
| SSIM( $\uparrow$ )    |                |                |                |                |                |                |
| LR                    | 0.8363         | 0.9064         | 0.9558         | 0.9148         | 0.9030         | 0.9033         |
| NeRF-SR [6]           | 0.8059         | 0.8793         | 0.9392         | 0.9298         | 0.8801         | 0.8869         |
| EDSR [4]              | 0.8459         | 0.9104         | 0.9612         | 0.9448         | 0.9100         | 0.9144         |
| SwinIR [3]            | 0.8483         | 0.9112         | 0.9625         | 0.9447         | 0.9118         | 0.9157         |
| MVSRnet [1]           | 0.8469         | 0.9107         | 0.9613         | 0.9446         | 0.9104         | 0.9148         |
| VRT [2]               | 0.8488         | 0.9113         | 0.9632         | <u>0.9448</u>  | 0.9116         | 0.9159         |
| Ours(CROP)+EDSR       | <u>0.8498</u>  | <u>0.9117</u>  | <u>0.9635</u>  | 0.9446         | <u>0.9125</u>  | <u>0.9164</u>  |
| Ours(CROP)+SwinIR     | <b>0.8528</b>  | <b>0.9126</b>  | <b>0.9642</b>  | <b>0.9449</b>  | <b>0.9136</b>  | <b>0.9176</b>  |
| LPIPS( $\downarrow$ ) |                |                |                |                |                |                |
| LR                    | 0.2879         | 0.1638         | 0.0753         | 0.1036         | 0.1583         | 0.1578         |
| NeRF-SR [6]           | 0.3505         | 0.2048         | 0.1024         | 0.1041         | 0.1982         | 0.1920         |
| EDSR [4]              | 0.2786         | 0.1597         | 0.0700         | 0.0820         | 0.1518         | 0.1484         |
| SwinIR [3]            | 0.2757         | 0.1576         | 0.0674         | 0.0817         | 0.1484         | 0.1462         |
| MVSRnet [1]           | 0.2770         | 0.1578         | 0.0687         | <u>0.0814</u>  | 0.1500         | 0.1470         |
| VRT [2]               | 0.2750         | 0.1578         | <u>0.0663</u>  | 0.0818         | 0.1483         | 0.1459         |
| Ours(CROP)+EDSR       | <u>0.2721</u>  | <u>0.1564</u>  | <u>0.0663</u>  | 0.0820         | <u>0.1451</u>  | <u>0.1444</u>  |
| Ours(CROP)+SwinIR     | <b>0.2681</b>  | <b>0.1546</b>  | <b>0.0645</b>  | <b>0.0810</b>  | <b>0.1441</b>  | <b>0.1425</b>  |

Table 6. HR novel view synthesis results on the Tanks and Temples dataset for X4 SR. **Bold** indicates the best results, and underline indicates the second best results.

| Method                | Barn           | Caterpillar    | Family         | Ignatius       | Truck          | Avg.           |
|-----------------------|----------------|----------------|----------------|----------------|----------------|----------------|
| PSNR( $\uparrow$ )    |                |                |                |                |                |                |
| EDSR [4]              | 32.1484        | 33.9276        | 36.3531        | 36.6149        | 33.4264        | 34.4941        |
| SwinIR [3]            | 33.4641        | <u>35.6484</u> | 37.3917        | 37.2503        | <u>34.7209</u> | 35.6951        |
| MVSRnet [1]           | 32.3777        | 34.4622        | 36.4573        | 36.8019        | 33.6488        | 34.7496        |
| VRT [2]               | <u>33.4813</u> | 35.5446        | <u>37.8286</u> | <u>37.3337</u> | 34.6037        | <u>35.7584</u> |
| Ours(CROP)+EDSR       | 32.5761        | 34.9083        | 37.2558        | 37.1567        | 34.1593        | 35.2112        |
| Ours(CROP)+SwinIR     | <b>33.6049</b> | <b>36.2304</b> | <b>38.2025</b> | <b>37.9578</b> | <b>35.2193</b> | <b>36.2430</b> |
| SSIM( $\uparrow$ )    |                |                |                |                |                |                |
| EDSR [4]              | 0.9047         | 0.9670         | 0.9704         | 0.9659         | 0.9536         | 0.9523         |
| SwinIR [3]            | <b>0.9219</b>  | <u>0.9751</u>  | 0.9742         | <u>0.9683</u>  | <u>0.9623</u>  | <u>0.9604</u>  |
| MVSRnet [1]           | 0.9063         | 0.9675         | 0.9702         | 0.9652         | 0.9536         | 0.9526         |
| VRT [2]               | 0.9205         | 0.9734         | <u>0.9755</u>  | 0.9680         | 0.9602         | 0.9595         |
| Ours(CROP)+EDSR       | 0.9109         | 0.9711         | 0.9746         | 0.9680         | 0.9592         | 0.9568         |
| Ours(CROP)+SwinIR     | <u>0.9215</u>  | <b>0.9754</b>  | <b>0.9766</b>  | <b>0.9692</b>  | <b>0.9637</b>  | <b>0.9613</b>  |
| LPIPS( $\downarrow$ ) |                |                |                |                |                |                |
| EDSR [4]              | 0.1714         | 0.0797         | 0.0617         | 0.0621         | 0.0942         | 0.0938         |
| SwinIR [3]            | <u>0.1520</u>  | <u>0.0691</u>  | 0.0570         | <u>0.0597</u>  | <u>0.0829</u>  | <u>0.0841</u>  |
| MVSRnet [1]           | 0.1727         | 0.0829         | 0.0660         | 0.0676         | 0.0984         | 0.0975         |
| VRT [2]               | 0.1545         | 0.0717         | <u>0.0548</u>  | 0.0606         | 0.0855         | 0.0854         |
| Ours(CROP)+EDSR       | 0.1669         | 0.0739         | 0.0585         | 0.0606         | 0.0886         | 0.0897         |
| Ours(CROP)+SwinIR     | <b>0.1500</b>  | <b>0.0661</b>  | <b>0.0526</b>  | <b>0.0566</b>  | <b>0.0789</b>  | <b>0.0808</b>  |

Table 7. Multi-view image SR results on the Tanks and Temples dataset for X4 SR. **Bold** indicates the best results, and underline indicates the second best results.

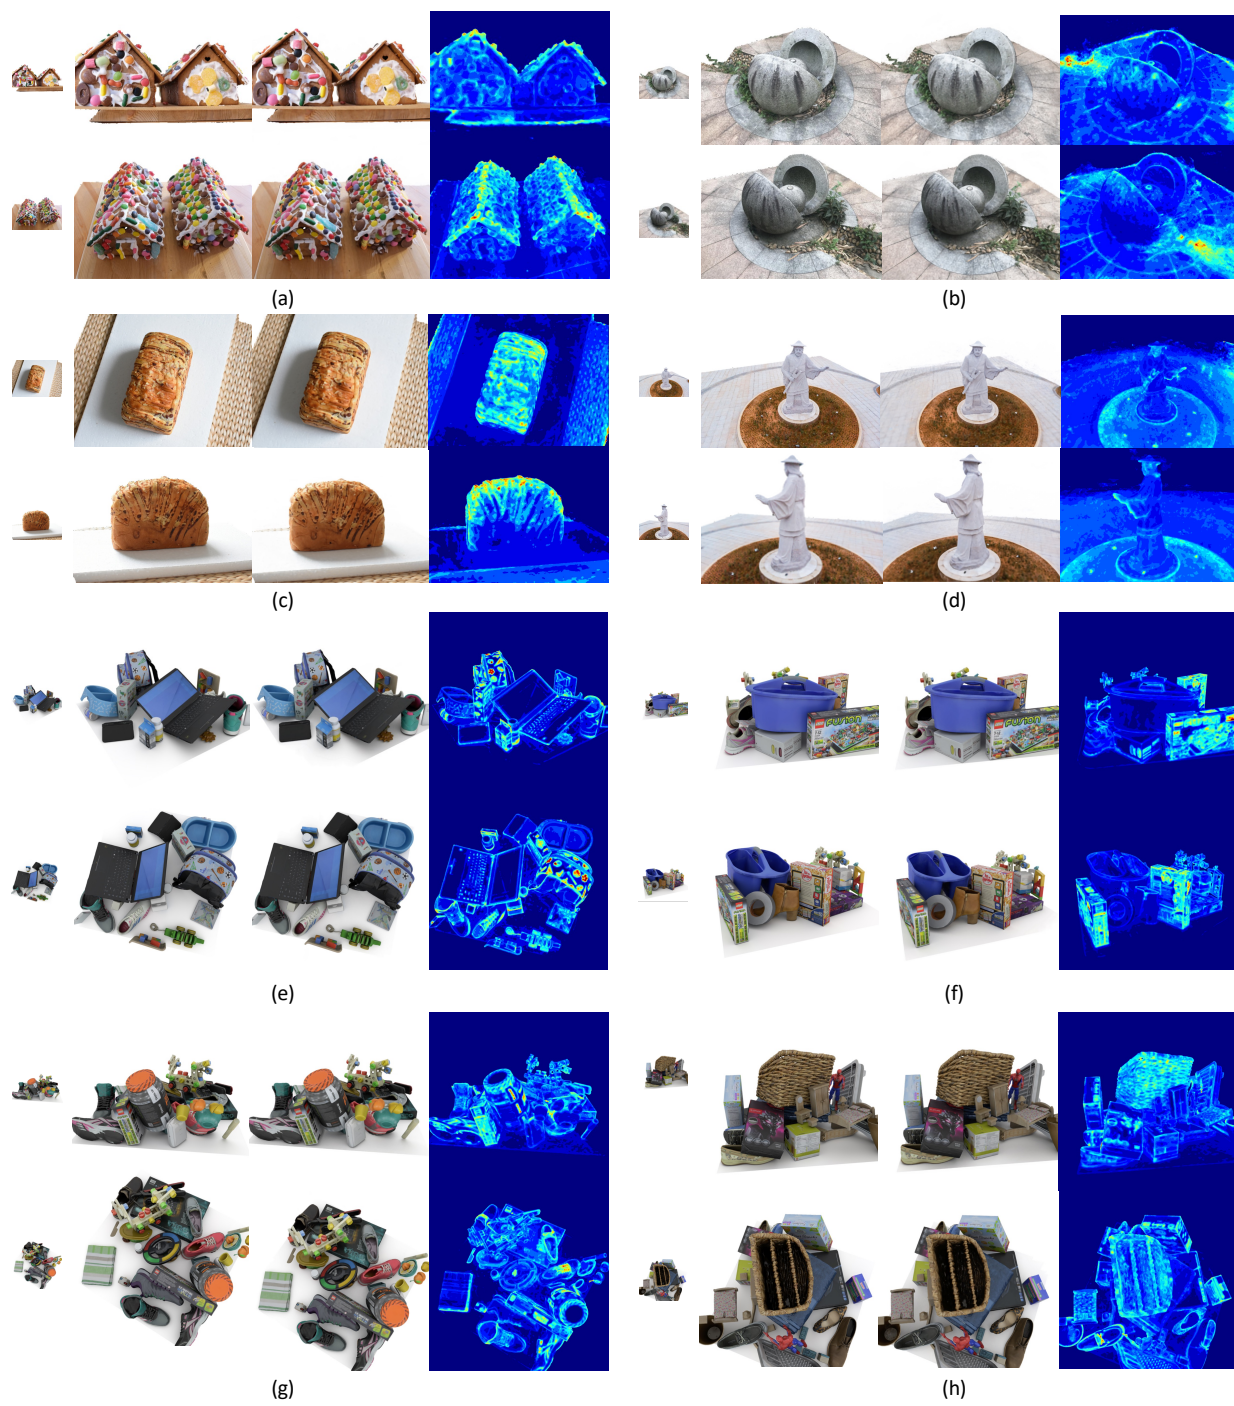

Figure 2. BlendedMVS(a,b,c,d) and RTMV(e,f,g,h) datasets for training SR update module (SUM).

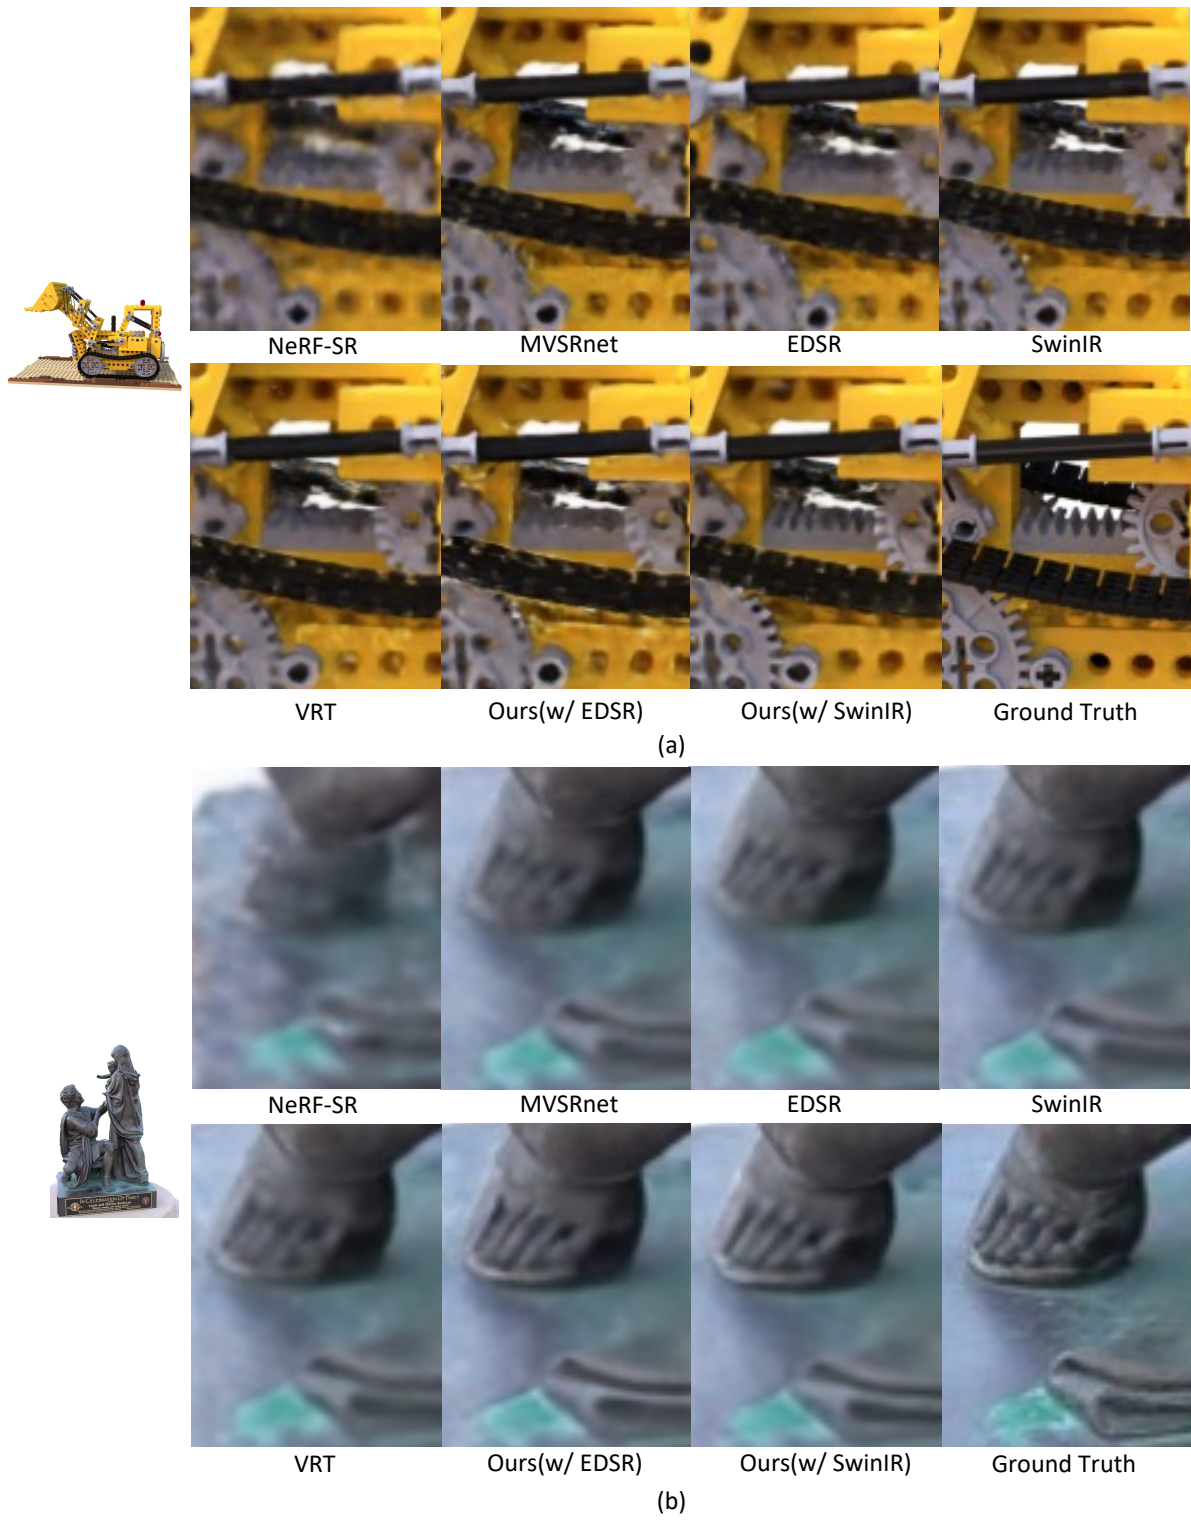

Figure 3. Qualitative comparisons of HR novel view synthesis of different methods.



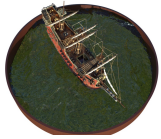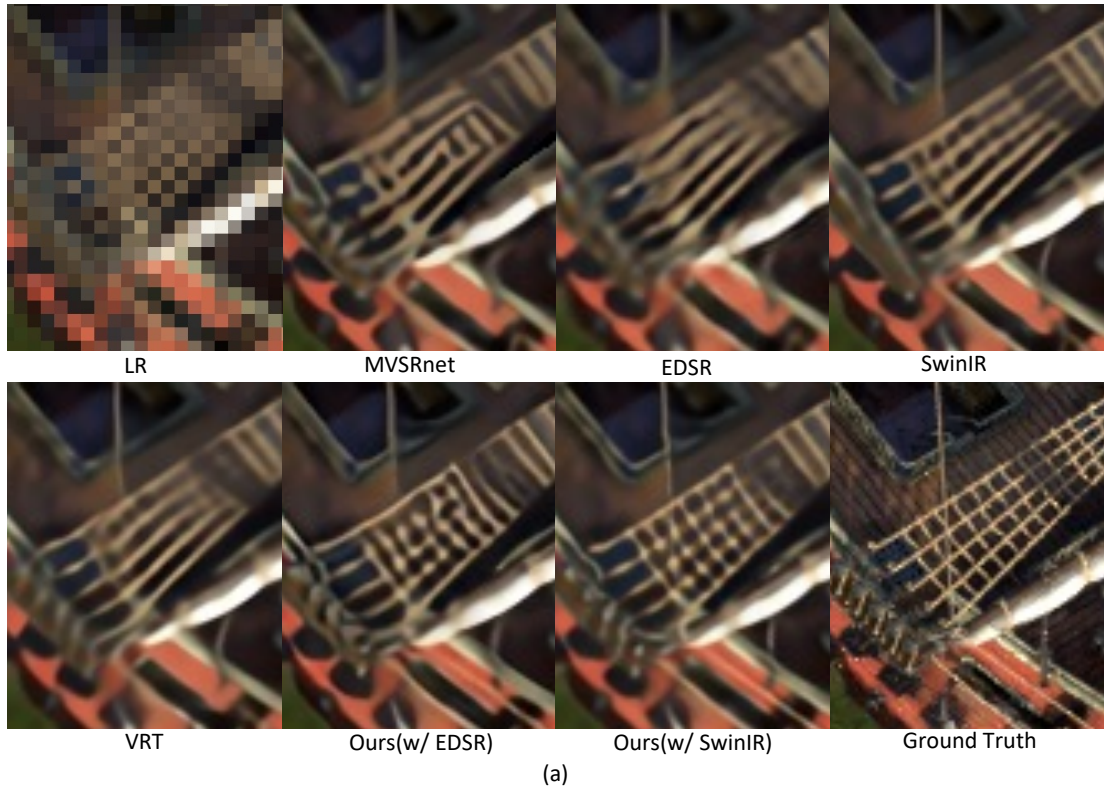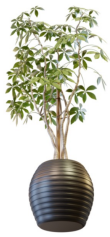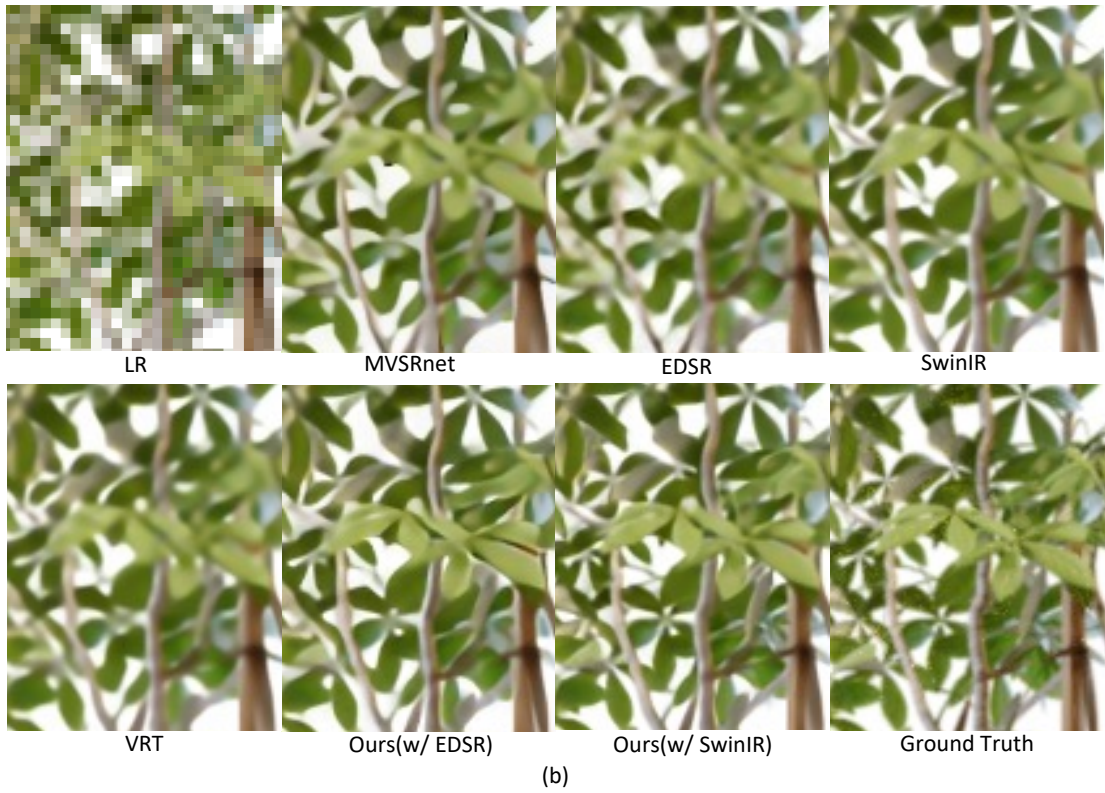

Figure 4. Qualitative comparisons of multi-view image SR of different methods.

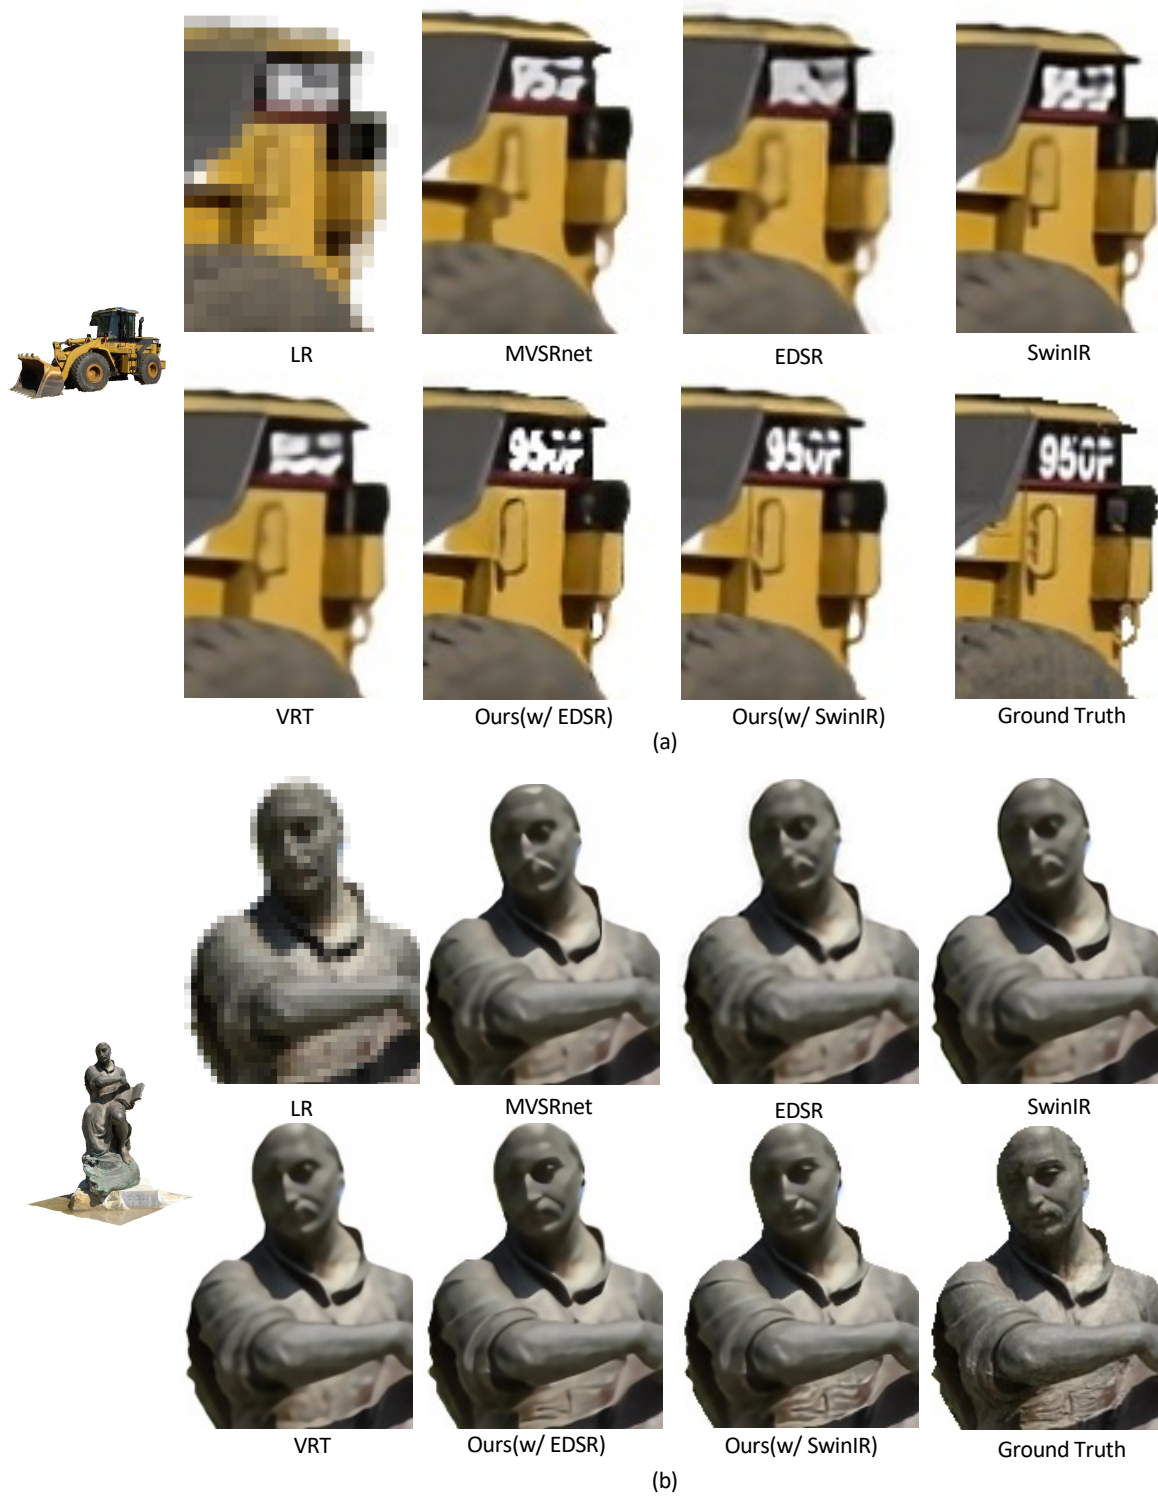

Figure 5. Qualitative comparisons of multi-view image SR of different methods.
